# Supplementary material for: Livestock Drugs and Disease: The Fatal Combination behind Breeding Failure in Endangered Bearded Vultures
Source: PLOS journal article supplement (doi:10.1371/journal.pone.0014163), 2010-11-30
Supplement: S1 (10.1371/journal.pone.0014163.s001) [file journal.pone.0014163.s001]

Supporting information

Table S1. Details on the PCR-based methods used in the determination of pathogens in nestlings and embryo bearded vultures. All analyses were conducted at the Museum of Natural History of Madrid (CSIC) and GIR-Diagnostics, Madrid, Spain.

| Pathogen | Primer used | Gen Bank  and/or manufacturer | Amplicon size |
| --- | --- | --- | --- |
| *Chlamyophila psittaci* | 201CHOMP  59-GGI GCW GMI TTC CAA TAY GCI CAR TC-39  CHOMP 336  59-CAA GMT TTT CTG GAY TTM AWY TTG TT-39 |  |  |
| *Mycoplasma* sp. | 5-GAG CTA ATC TGT AAA GTT GGT C-3  5-GCT TCC TTG CGG TTA GCA AC-3 |  |  |
| Poxvirus | Core protein gene (sense):  59-CAGCAGGTGCTAAACAACAA-39  Core protein gene (antisense):  59-CGGTAGCTTAACGCCGAATA-39  Core protein-II gene (sense):  59-CAGCAGGTGCTAAACAACAA-39  Core protein-II gene (antisense):  59-TCCGCCGTCGCAACTTCCGG-39 |  |  |
| Paramyxovius type I (Newcastle disease) | Lentogens  FT NDV LF3 TCC GBA GGA TAC AAG AGT CYG TGA CC  FT NDV LF4 TCC GBA GGA TAC AAG AGT CYG TGA CT  FT NDV LR2 AGA GCY ACA CCG CCA ATA AT  FT NDV LR3 AGA GCY ACA CCA CCG ATA AT  FT NDV L probe 2 CAG GGR CGC CTT ATA  Velogens/mesogens  FT NDV VF1 GAY TCY ATC CGY AGG ATA CAA GRG TC  FT NDV VR2 AAC CCC AAG AGC TAC ACY RCC  FT NDV VR3 GAC CCC AAG AGC TAC ACY RCC  FT NDV V probe 1 AAR CGT YTC TGY CTC C  FT NDV Vprobe 2 AGA RAC GCT TTR TAG GTG C | Positions  4839–4864  4923–4904  4883–4897  4832–4857  4930–4910  4893–4878  4884–4902 | 85  99 |
| Avian influenza virus (H5, H7 and H9) | AI-For-37 5’- gacctGATGAGTCTTCTAACCGAGGTC-3’  AI-Rev-181 5’- TGTCTTTAGCCAYTCCATGAG -3’ | A/Hong Kong/213/03 (H5N1) AIV isolate (GenBank accession number AB212057) positions 25–46 and 169–149 |  |
| Falcon adenovirus | The TaqMan assay was real-time falcon-specific pVI region with EIC: falcon adenovirus forward TaqMan primer CGCTACCCGTCATGCTACTTAA; falcon adenovirus reverse TaqMan primer CCCAAGCGCCGACGTA; falcon adenovirus TaqMan probe FAMAAGGCCGGGTAACTGGAGAGGTCG |  |  |
| Circovirus | 5-GTTATACGCCGCCGTAATC-3  5-AACCCTACAGACGGCGAG-3  3 -GTTAAGGGTGAAACACCAACG-3  5-GTCACAGTCCTCCTTGTACC-3  5-TGGTACAAGGAGGACTGTGAC-3  5-CCAGCACTTAATAAAGACTCAG-3  5-TAACATTTGCGTTGGAGGAC-3  *Circo-s* 5-CGG TGC CAG AAA ATG GTA TGT TAG-3  *Circo-as* 5-GAA GCT GAA GCC AAT GCC GTA-3 | ORF V1 717bp  84±102  182±199  182±199  879±898  878±898  1224±1245  1729±1749  ORF C1 202bp |  |
| Herpesvirus | 5 -CGCGACTATGTCCACGAGAA-3  5-TGCGTACCGCCAATCAGATA-3  5-FAMTCGGCGTTCCCAGATACGGCC-3 | (Geneworks, Thebarton, SA, AUS)  (Applied Biosystems, Foster City, CA, USA) |  |
| Polyomavirus | BamHI 5 TATGGATCCGTTATGGTTATGACTGCCATGGAGGAGTCA- 3  EcoRI 5-TATGAATTCGTCTGAGTCAGGCCCCACTTT- 3 | New England BioLabs |  |
| Reovirus | PAF 5-ACTTCTTYaTCTACGCCTTTCG-3  PAR 5-ATYbAAWcDdCWeCGCATCTGCTG-3 | 34–55  640–659 |  |
| West Nile virus | *WN132* 5′ GAAAACATCAAGTATGAGG 3′  *WN240* 5′ GAGGTTCTTCAAACTCCAT 3′ |  |  |
| Alphaherpesvirus (Marek disease) | *meq* (MDV1) 5 -GAATCTTCCCTGCATTGTGTC-3  5 -ATCTGGCCCGAATACAAGGAA-3_  *sorf1* (HVT) 5-AAGCGCTTGTATGTGTAGG-3_  5-TATGGACGTCATGCAGTTGG-3 |  | 196  350 |
| Gyrovirus (infectious chicken anaemia) | *Eco R1 forward* 5 ATCGAATTCCGAGTGGTTACTATTCC  *Bam H1 reverse* 5 GAAGGATCCCTCATTCTTAGTGGC  *Eco R1 forward* 5 TCGGAATTCGATAGTGCGATAAATC  *Bam H1 reverse* 5 GAGGGATCCTTCAGCCCCGTGGCG  *EcoR1 reverse 2(nested)* 5 TATTTTCTGCGTTTATTGAG  *Bam H1 forward 2 (nested)* 5 AGTCTTCTCTCCCAGGGAGA |  |  |
| Birnavirus (infectious bursal disease) | B5 5 TCTTGGGTATGTGAGGCTTG 3  B4 3 GGATGTGATTGGCTGGGTTA 5 | 400-base pair (bp) segment of the hypervariable region of the IBDV VP2 gene (GenBank accession number DQ355819) |  |
| Coronavirus (chicken infectious bronchitis) | 5’-CCCGGATCCATGGCAAGCGGTAA-3’  5’-CCCGTCGACTCAAAGTTCATTTTCAC-3’ |  |  |
